1 **Factors that influence scientific productivity from different countries: A causal approach through**  
2 **multiple regression using panel data**

3

4 **Bárbara S. Lancho- Barrantes, Héctor G. Ceballos, Francisco J. Cantú- Ortiz**

5 Tecnologico de Monterrey, Av. Garza Sada 2501, 64849 Monterrey, N.L., Mexico

6

7

8

9 **Bárbara S. Lancho- Barrantes, PhD**

10

11 ORCID iD: 0000-0001-9994-8886

12 [bslancho@itesm.mx](mailto:bslancho@itesm.mx)

13

14 Tecnologico de Monterrey, Direccion de Investigacion, Av. Garza Sada 2501, 64849 Monterrey, N.L., Mexico

15

16 (+52) 81 8358 2000 Ext. 5153

17 (+52) 81 8158 2264 FAX

18 (+34) 617 625 984

19

20

21 **Héctor G. Ceballos, PhD**

22

23 ORCID iD: 0000-0002-2460-3442

24 [ceballos@tec.mx](mailto:ceballos@tec.mx)

25

26 Tecnologico de Monterrey, Direccion de Investigacion, Av. Garza Sada 2501, 64849 Monterrey, N.L., Mexico

27

28 (+52) 81 8358 2000 Ext. 5153

29 (+52) 81 8158 2264 FAX

30

31

32

33

34 **Francisco J. Cantú- Ortiz, PhD**

35

36 ORCID iD: 0000-0002-2015-0562

37 [fcantu@itesm.mx](mailto:fcantu@itesm.mx)

38

39 Tecnologico de Monterrey, Direccion de Investigacion, Av. Garza Sada 2501, 64849 Monterrey, N.L., Mexico

40

41 (+52) 81 8328 4377

42 (+52) 81 8158 2264 FAX

43

44

45 Correspondence concerning this paper should be addressed to:

46

47 Bárbara S. Lancho-Barrantes, PhD

48 [bslancho@itesm.mx](mailto:bslancho@itesm.mx)

49 [bslancho@outlook.com](mailto:bslancho@outlook.com)

50

51

52

53

54

55 **Abstract**

56 The main purpose of the economic expenditure of countries in research and development is to achieve higher levels  
57 of scientific findings within research ecosystems, which in turn could generate better living standards for society.  
58 Therefore, the collection of scientific production constitutes a faithful image of the capacity, trajectory and  
59 scientific depth assignable to each country. The intention of this article is to contribute to the understanding of the  
60 factors that certainly influence in the scientific production and how could be improved. In order to achieve this  
61 challenge, we select a sample of 19 countries considered partners in science and technology. On the one hand we  
62 download social and economic variables (gross domestic expenditure on R&D (GERD) as a percentage of gross  
63 domestic product (GDP) and researchers in full-time equivalent (FTE)) and on the other hand variables related to  
64 scientific results (total scientific production, scientific production by subject areas and by different institutions,  
65 without overlook the citations received as an impact measure) all this data within a 17-year time window. Through  
66 a causal model with multiple linear regression using panel data, the experiment confirms that two independent (or  
67 explanatory) variables of five selected explain the amount of scientific production by 98% for the countries  
68 analyzed. An important conclusion that we highlight stays the importance of checking for compliance of statistical  
69 assumptions when using multiple regression in research studies. As a result, we built a reliable predictive model  
70 to analyze scenarios in which the increase in any of the independent variables causes a positive effect on scientific  
71 production. This model allows decision maker to make comparison among countries and helps in the formulation  
72 of future plans on national scientific policies.

73 **Keywords**

74

75 Scientific Production, Publication Forecasting, National Research Expenditure, Causality, Panel Data, Multiple  
76 Regression

77

78

79 **Factors that influence scientific productivity from different countries: A causal approach**  
80 **through multiple regression using panel data**

81

82 **Abstract**

83 The main purpose of the economic expenditure of countries in research and development is to achieve higher levels  
84 of scientific findings within research ecosystems, which in turn could generate better living standards for society.  
85 Therefore, the collection of scientific production constitutes a faithful image of the capacity, trajectory and  
86 scientific depth assignable to each country. The intention of this article is to contribute to the understanding of the  
87 factors that certainly influence in the scientific production and how could be improved. In order to achieve this  
88 challenge, we select a sample of 19 countries considered partners in science and technology. On the one hand we  
89 download social and economic variables (gross domestic expenditure on R&D (GERD) as a percentage of gross  
90 domestic product (GDP) and researchers in full-time equivalent (FTE)) and on the other hand variables related to  
91 scientific results (total scientific production, scientific production by subject areas and by different institutions,  
92 without overlook the citations received as an impact measure) all this data within a 17-year time window. Through  
93 a causal model with multiple linear regression using panel data, the experiment confirms that two independent (or  
94 explanatory) variables of five selected explain the amount of scientific production by 98% for the countries  
95 analyzed. An important conclusion that we highlight stays the importance of checking for compliance of statistical  
96 assumptions when using multiple regression in research studies. As a result, we built a reliable predictive model  
97 to analyze scenarios in which the increase in any of the independent variables causes a positive effect on scientific  
98 production. This model allows decision maker to make comparison among countries and helps in the formulation  
99 of future plans on national scientific policies.

## 100 **Keywords**

101 Scientific Production, Publication Forecasting, National Research Expenditure, Causality, Panel Data, Multiple  
102 Regression

## 104 **1. Introduction**

105 Research is an ensemble of activities performed by academicians to produce new knowledge contributing with  
106 this to the development and progress of entire society. Research results mainly are disseminated through scientific  
107 papers, reviews, conference proceedings, even monographs or book-chapters etc. [1]. The resulting collection of  
108 documents is known as scientific production which may correspond to the productivity of a year, a specific period,  
109 a researcher, a research group, an institution, a discipline, or even a whole country [2].

110 The amount of scientific production can increase, decrease or become stagnant because is an unfixed parameter  
111 influenced by many other external features of economic, sociological, cultural, and political nature [3]. In fact the  
112 scientific literature encompasses diverse works that demonstrate that scientific production is influenced by

113 institutional conditions, cultural dimensions, knowledge management processes, barriers in access to information,  
114 technological and human capital, such as databases, scientific resources, software licenses, well-equipped  
115 laboratories, material in optimum conditions, and personnel dedicated to research & development (R&D), etc. [1,  
116 4-6].

117 Barjak [7] classified factors that affect scientific production into individual personal circumstances, such as  
118 research motivation, experience, personality, mobility and adaptation to change, creativity, age, gender,  
119 professional range, recognition, compulsory teaching, administrative and management assignments,  
120 communication skills with colleagues, and participation in international research networks. In addition, scientific  
121 production could be influenced by environmental and sociological conditions, such as idiosyncrasy of countries,  
122 demographic traits, disciplines patterns, institutional thematic preferences, research group sizes, institutional  
123 prestige, and research freedom.

124 Collaborative factors have also been considered as influential. In addition, new information technologies allow  
125 researchers collaborate in different geographic areas to share resources, skills, and competencies. Furthermore,  
126 many works have manifested that high levels of scientific collaboration lead to greater research productivity,  
127 greater papers quality, and higher levels of impact and citations in publications [8-15].

128 Some studies have revealed a significant relationship between scientific production and the global economy [16-  
129 19]. Other studies have described the relationship between inputs (i.e., funding and economic investments in R&D)  
130 and outputs (i.e., generated results) [1, 20-23]. Other studies have analyzed the impact of gross domestic product  
131 (GDP) and investment in research on the number of universities and indexed journals and citations in different  
132 countries [24-27].

133  
134 However, other studies have shown that simple correlation analysis could not reveal relation among variables  
135 because could not be entirely accurate to infer real causality with such kind of analyses [18, 19]. Lee, Lin, Chuang,  
136 & Lee [28] and Ntuli, Inglesi-Lotz, Chang, & Pouris [29] examined the causal relationship between research  
137 production and economic productivity applying the bootstrap panel Granger causality, and Inglesi-Lotz et al. [17]  
138 also applied panel causality test to examine the causal relationship between research performance and economic  
139 growth using Brazil, Russia, India, China, and South Africa (BRICS) data.

140 Furthermore, there is a large number of theoretical works which have demonstrated the relationship of these  
141 variables with scientific production: economic investment in science [20, 29], researchers [22, 30], institutions  
142 [24-26, 31], disciplines [32-34], and the citations obtained [35, 36].

143 Nevertheless, to date, no single criterion could identify the influencing determinants because scientific production  
144 could be altered by other imperceptible external factors. In order to contribute to the collection of studies concerned  
145 about the behaviour of scientific production we have elaborated a regression model using panel data to examine  
146 the scientific production of strategic countries through a succession of influential variables at the same time.

147  
148 We selected a sample of 19 countries considered partners in science and technology with data from 17 year time  
149 window. The originality and main advantage of this study is to apply multiple regression using panel data to a  
150 diverse set of countries considered strategic partners in science and technology. Through panel data we can capture  
151 unobservable heterogeneity, either between economic agents or studies over time, because heterogeneity cannot  
152 be detected by time-series or cross-sectional studies. Multiple regression with panel data enables more dynamic  
153 analysis by incorporating the temporal dimension, which enriches the study, particularly in periods of significant  
154 and multiple changes. Panel data models are frequently used in statistic and econometric studies. Multiple  
155 regression enables analysis of two important aspects when working with panel data that form part of the  
156 unobservable heterogeneity, i.e., specific individuals and temporary effects. This technique allows researchers to  
157 have a greater number of observations, improving of information quality and efficiency because increasing the  
158 sample size, we obtain more information about the population and, consequently, the degrees of freedom increase  
159 [37].

160 In order to choose the explanatory variables, we followed an empirical procedure based on previous statistical  
161 experiments with scientific production variable. Beforehand we selected a large number of variables which we  
162 consider influencing scientific production however they were ultimately reduced by statistical procedures. Note  
163 that even without an empirical procedures we could have affirmed that some external variables can influence  
164 scientific production by research logic and observation of this phenomenon.

165 The variables chosen are the following: the most important is expenditure in research, without this economic input  
166 we could not do anything in science. The second one is the human labor ‘researchers’, is also something reasonable,  
167 since they represent the human force to perform research production. Moreover, the third is the countries’ research  
168 preference measured by scientific production in disciplines. The fourth variable is the higher education and  
169 research institutions because they are responsible for hosting the scientific processes playing an enormous  
170 importance in the production. Finally, citations were selected as another exogenous variable. Citations motivate  
171 researchers to continue producing, collaborating, or developing a specific productive research line- when a group  
172 of researchers collaborate and these collaborations are successful with respect to the impact received and citations,

173 this motives to continue collaborating. Consequently citations is a variable that encourages collaboration and with  
174 collaboration increases the scientific production.

175 Therefore, we have chosen the variables which consider the most relevant for our study. We believe that could  
176 make governments reconsider their scientific policies when assigning their economic resources.

177 A number of research questions are formulated: Could the selected variables together explain the scientific  
178 production behaviour? If governments increase investment in science, by 1%, would scientific production  
179 increase? Would increasing the number of researchers improve scientific production? Are a small group of  
180 institutions responsible for increasing scientific production? Is a concentrated number of disciplines responsible  
181 for increased scientific production? Does the total number of citations motivate researchers to continue publishing?  
182 Our working hypothesis is as follows: variations in scientific production can be explained by the previously  
183 identified descriptive variables (economic expenditure, researchers, research preference, academic and research  
184 institutions, citation received) considering that these variables show dynamic behaviour over time. In other words,  
185 we contend that a causal relationship between scientific production and exogenous variables can be captured by  
186 regression analysis using panel data.

187 We are aware that investment in research is not allocated in an equal manner in all scientific areas, however we  
188 have analyzed all countries with the same variables to make a comparison. In a future study we could dismember  
189 the economic investment destined to the different areas and also account for the resulting production in those areas.  
190 Similarly we would like to point out that investment in research is channeled and destined to different sectors,  
191 however we consider that production can be seen as a way to materialize that economic injection.

192 In order to select a sample of countries we choose Mexico and its 18 strategic countries in science and technology  
193 [38]. This is a diverse, consolidated, defined, closed, easily controllable and heterogeneous sample which could  
194 be an example closer to the behaviour of the world reality. For this we consider this as an adequate sample to  
195 answer our questions and test the hypothesis since this conforms a wide sample of countries.

196 Some bibliometrics studies focusing on Mexico have been published. The most recent is about the general  
197 scientific production of Mexico [39]. Moreover Arvantis, Russel, Rosas, & A., [40] analyzed articles from Mexico  
198 in the National Citation Report database. Lima, Liberman, & Russell, [41] studied the relationship between the  
199 number of links among an article's authors and a Likert scale-based measure of group cohesion in three research  
200 areas, i.e., biotechnology, mathematics, and physics, at the National Autonomous University of Mexico (UNAM).  
201 Castillo-Pérez, Muñoz-Valera, García-Gómez, & Mejía-Aranguré [42] analyzed the volume and impact of  
202 Mexican scientific production relative to influenza published in the Science Citation Index between 2000 and

203 2012. Uddin, Singh, Pinto, & Olmos [43] published a detailed, text-based, scientometric analysis of computer  
204 science research in Mexico from 1989 to 2014 indexed in the Web of Science. Franco-Paredes, Díaz-Reséndiz,  
205 Pineda-Lozano, & Hidalgo Rasmussen, [44] characterized the scientific production of the Mexican Journal of  
206 Eating Disorders during the period of 2010–2014. Frixione, Ruiz-Zamarripa & Hernández [45] conducted a limited  
207 survey of the functioning and results of the 30+-year-old National System of Researchers, which is Mexico’s  
208 primary instrument to stimulate competitive science and technology research. Hernandez-Garcia, Chamizo,  
209 Kleiche-Dray, & Russell [46] studied steroid research between 1935 and 1965. The bibliometrics and searches in  
210 patent files in their paper indicated that the Syntex industrial laboratory in Mexico and the National Autonomous  
211 University of Mexico (UNAM) produced approximately 54% of the documents in the main journals, which in turn  
212 generated more than 80% of the citations in this period. Villaseñor, Arencibia, & Carrillo-Calvet [47] produced  
213 multiparametric scientometric characterizations of the production profiles of the 50 most productive Mexican  
214 higher education institutions listed in Scopus, Elsevier’s international bibliographic database [48]

215

## 216 **2. Material and methods**

217 In order to perform this study, we chose a sample of strategic partners’ countries which are different in cultural,  
218 social, and economic magnitudes and there is a representation of all regions of the world. The countries’ sample  
219 is identified in Conacyt’s latest general report on science, technology, and innovation [38], as shown in Table 1.

220

221 Table 1. Strategic countries [38]

| Region           | Countries                                      |
|------------------|------------------------------------------------|
| Africa           | South Africa                                   |
| Asiatic Region   | China, Japan, South Korea, and India           |
| Eastern Europe   | Russian Federation                             |
| Latin America    | Argentina, Brazil, Colombia, Chile, Mexico     |
| Middle East      | Israel and Turkey                              |
| Northern America | Canada and the United States                   |
| Western Europe   | Germany, Spain, France, and the United Kingdom |

222

223

224 We used Scopus to extract scientific variables (scientific production, scientific production by disciplines and  
225 institutions) because it represents the overall structure of world science at a global scale. Scopus is the world’s  
226 largest scientific database which is the most comprehensive and accurate bibliometric database widely used in  
227 diverse studies. It covers journals included in the Thomson Scientific Web of Science (WoS) and more [49], and



228 its coverage is statistically balanced in terms of subjects, countries, languages, and publishers. We have also used  
229 SciVal to extract the total number of citations received.

230 For the economic component of the study, we used statistics provided by the United Nations Educational,  
231 Scientific, and Cultural Organization (UNESCO) Institute for Statistics (UIS) [50] to extract the gross domestic  
232 expenditure on research and development (GERD) as a percentage of GDP (GERD/GDP) as well as number of  
233 researchers per million inhabitants calculated as a full-time equivalent (FTE).

234 UNESCO takes the data from the OECD database. However, it is worth pointing out that many of strategic  
235 countries do not belong to the OECD; therefore, to give consistency to the sources, we decided to use only the data  
236 from UNESCO statistical database instead of OECD's data.

237 The timeframe for the economic part of our study (GERD/GDP and Researchers) was 1996–2012. The oldest data  
238 are from 1996, which is the first year for which complete country data exists in the UNESCO database. To measure  
239 the effect of investment in research on scientific productivity, we displaced the scientometric data by three years.  
240 The three-year displacement period was employed because the effect of GERD/GDP investment on scientific  
241 production takes at least three years to manifest. We determined the three-year displacement period by  
242 experimenting with several time windows.

243 The time frame for the temporal data in the scientometric sample (i.e., scientific production, citations, institutions,  
244 and disciplines) was 1999–2015. The temporal data, both economic and scientometric, encompass a total of 17  
245 years.

246 We downloaded data from Scopus, SciVal, and UNESCO in March 10, 2017.

247

248 Variable definitions:

249

250 **Dependent or outcome variable:**

251

252 *Scientific production:* Total number of documents produced by the target countries (1999–2015). All document  
253 typologies are considered. Note that in order to assign the same weight to all countries we used whole counting  
254 instead of fractionalized ones to measure research output of countries.

255

256 **Independent or predictor variables:**

257



258 *GERD as a percentage of GDP*: Gross domestic spending on R&D is defined as the total expenditure (current and  
259 capital) on R&D by all resident companies, research institutes, university and government laboratories, etc., in a  
260 country. It includes R&D funded from abroad but excludes domestic funds for R&D performed outside the  
261 domestic economy. This indicator is measured in million USD and as a percentage of GDP [50]. Note that in this  
262 context, GDP is defined as the sum of the gross value contributed by all resident producers in the economy,  
263 including distributive trades and transport. Here GDP includes product taxes but does not include subsidies, i.e.,  
264 subsidies not included in the value of the products have been subtracted. This measure is defined to better  
265 understand GERD/GDP; however, it has not been taken as an independent variable [50].

266 We used GERD, as this indicator groups the investment data in a global way (both government, business, other  
267 organizations, etc.). This refers to investment in research and technological development. GERD expenditure  
268 broken down into other four indicators like HERD - Higher Education Expenditure on R&D, GOVERD -  
269 Government Expenditure on R&D, BERD - Business Enterprise Expenditure on R&D, and Private Non-Profit  
270 Research and Development (PNP).

271 *Researchers (FTE)*: Represents the number of professionals engaged in the conception or creation of new  
272 knowledge, i.e., professionals who conduct research and improve or develop concepts, theories, models,  
273 instrumentation techniques, software, or operational methods, during a given year expressed as a proportion of a  
274 population of one million. Researchers FTE is calculated as the number of researchers during a given year divided  
275 by the total population (using the mid-year population as reference) multiplied by 1,000,000 [50].

276 *Academic & research institutions (A&RI)*: Total number of institutions responsible for at least 50% of the  
277 production of each country in a year. We identified only institutions that generated at least 50% of the annual  
278 scientific production during the study period. We used this information to determine institutions' influence in  
279 scientific production.

280 *Subject areas*: the total number of subject areas involved in at least 50% of the production of each country in a  
281 year. We determined how many of the 27 subject areas included in Scopus are included in at least 50% of the  
282 scientific production to verify if the degree of concentration or dispersion in research disciplines influences the  
283 behavior of general scientific production.

284 *Citations received*: Total number of citations (up to last data cut) for documents published in a year.

285

286 **Multiple linear regression using panel data**

287

288 Multiple linear regression at a significance level of 5% ( $\alpha = 0.05$ ) was used to determine causality between  
289 scientific production and the predictor variables. Here the dependent variable (Y) represents scientific production  
290 and the explanatory and independent variables (X) are GERD/GDP, researchers, A&RI, subject areas, and  
291 citations. Since our sample combines temporal and transversal dimensions, the most adequate model to explain  
292 causality can be obtained using panel data. This will allow us to analyze the general effect and observe the  
293 individual outcome for each country in consideration of the influence of explanatory variables on the dependent  
294 variable.

295 To measure this effect, we have also created binary dummy variables to quantify the effect of the country on the  
296 scientific production variable, which takes a value of 1 when the analyzed country is present and 0 when the  
297 country is not present.

298 When extracting data from the UNESCO database, we detected incomplete data for some countries (i.e., Israel,  
299 South Africa, India, Colombia, Turkey, Brazil, and Chile); therefore, to maintain accuracy we decided not select  
300 these countries in the present study. An analysis of factors influencing their scientific production could be  
301 explained with other methods in future works.

302 As a result, a total of 12 countries with 204 observations for the 17-year period were considered in this study.

303

## 304 **2.1 Statistical assumptions**

305

306 We consider that checking the validity of statistical assumptions required by multiple regression using panel data  
307 is a particular strength in this study. We deliberately decided to mention in this paper the variables that did not  
308 comply with the statistical assumptions instead of removing them or choosing others. We noticed that in some  
309 published studies where regression analysis is used, statistical assumptions are not mentioned, obviated, or only  
310 validated with respect to the multicollinearity assumption. This could lead to unreliable and imprecise results and  
311 this is something we avoid in this study.

312 We consciously leave the variables that did not meet the assumptions to alert the scientific community of an  
313 incomplete use of the regression in bibliometrics could damage the scientific results.

314 We performed our statistical analyses using the SPSS (version 24) statistical package. We tested the statistical  
315 assumptions of the multiple linear regression modeling because, to create inferences about Y from the sample data,  
316 it is necessary to establish assumptions about the behavior of error  $\epsilon$ , which defines the random behavior of Y, and  
317 perform experiments according to these assumptions.

318 The assumptions of the multiple regression modeling we evaluated are as follows.

319 **Linearity assumption:** The regression model assumes that the relationship between the dependent and  
320 independent variables is linear; however, in practice, some variables demonstrate curvilinear (i.e., nonlinear)  
321 relationships. Note that estimating a linear regression model with variables that have nonlinear relationships results  
322 in unreliable and imprecise estimates.

323 **Multicollinearity assumption:** In addition to linearity, another principle of regression modeling is that the  
324 explanatory variables should not be correlated with each other. When two explanatory variables are strongly  
325 correlated, a collinearity problem exists, and when more than two are correlated, we have a multicollinearity  
326 problem. We used the following to identify if such problems were present: a matrix of correlations between  
327 explanatory variables, the variance inflation factor (VIF), multicollinearity diagnoses, and the proportion of  
328 variance. As per the correlation matrix, if two or more variables have a correlation coefficient greater than or equal  
329 to 0.9, there is a collinearity or multicollinearity problem. If the VIF is greater than or equal to 10, there are  
330 collinearity or multicollinearity problems. With the multicollinearity diagnoses, we can check the condition index,  
331 which measures the association between independent variables. Its value is the square root between the largest and  
332 the smallest eigenvalue. If its value is greater than or equal to 30, there are strong multicollinearity problems as  
333 long as this value is attributed to the explanatory variables. The proportion of variance measures the origin of  
334 multicollinearity. It represents the proportion of the variance that each eigenvalue has in each explanatory variable.  
335 If two or more variables have a ratio of 0.9 or greater, this indicates that those variables have a multicollinearity  
336 problem.

337 **Assumption of normality:** For any combination of the values of X, variable Y must have normal distribution.  
338 Failure to comply with this assumption invalidates the statistical tests performed on the regression coefficients and  
339 the future values of Y. In our case, this assumption is the easiest to validate given that we have a large sample  
340 ( $n \geq 30$ ), and in practice, according to the Central Limit Theorem of large samples, we conclude that our data meet  
341 the normality assumption.

342 **Extreme and influential observations assumption:** An observation that is distant from the rest of the data is  
343 considered an outlier observation. Both extreme and influential observations affect estimations because they  
344 considerably modify estimates, i.e., standard errors of high coefficients, low determination coefficients, and  
345 coefficients with signs or with magnitudes that are significantly different from their true values. We evaluated this  
346 using the Cook Distance criterion. An observation can be considered influential if the Cook Distance is greater  
347 than or equal to 1.

348 **Assumption of independence:** There should be either no dependence or correlation between the values of the  
349 error term  $\varepsilon$  and between the values of the “y” variable. Violation of this assumption is known as autocorrelation.  
350 One corrective measure to assure the assumption of independence is the Cochrane–Orcutt transformation.  
351 However, we used the Durbin–Watson test to validate if the independence assumption is satisfied. The value of  
352 the test statistic “d” ranges from 0 to  $-4$ , where small values close to 0 indicate a positive autocorrelation and large  
353 values indicate a negative autocorrelation.  
354  
355 Additionally, we used the Newey–West estimators during the regression to try to overcome heteroscedasticity  
356 introduced by the differences among national research policies. Despite the use of these estimators do not change  
357 the value of the coefficients obtained without the Newey–West correction, it corrects their significance in some  
358 cases.  
359 Once we checked the statistical assumptions for this study, we detected noncompliance with some of the selected  
360 variables:  
361 Researchers (FTE): This variable presented strong collinearity with GERD/GDP. This appears somewhat logical  
362 because researchers are a consequence of investment in science. We decided to keep GERD/GDP in the regression  
363 because this is an essential variable controlled by the government.  
364 Subject areas: When data were extracted from the Scopus database, we found that this variable remained constant  
365 for all countries over time, and as is well known, regression requires variability in data, particularly when making  
366 forecasts [51]. The number of subject areas with almost 50% of scientific production in all countries ranged from  
367 three to six in each year.  
368 Citations: Linearity is the first requirement of multiple regression. This variable demonstrated a curvilinear form  
369 for all countries, which was impossible to correct by any type of linearity transformation.  
370  
371 Finally, we obtained two explanatory variables: GERD/GDP and A&RI in addition to the dummy variables of the  
372 countries. With these variables, we validated and fulfilled the five statistical assumptions: linearity,  
373 multicollinearity, extreme and influential observations, normality, independence and also heteroscedasticity. With  
374 multiple linear regression using SPSS, we obtained a model comprising the following two equations.  
375  
376 The first equation includes the dependent variable (Y) scientific production, and the independent variables (Xs),  
377 GERD/GDP ( $X_1$ ) and A&RI ( $X_2$ ), as well as the corresponding dummy variables for each country. For a better

378 estimation of the data, all variables, including the dependent variable, were transformed by applying a natural  
379 logarithm, except for the dummy variables because they are binary variables. If the effect of the country (dummy  
380 variables) is not present, we obtain the following equation.

381

382

$$\text{Scientific Production} = \beta_0 + \beta_1 (\text{GERD/GDP}) + \beta_2 (\text{A\&RI})$$

383

384 The second equation considers that the 12 countries are present, and the estimated model allows us to analyze the  
385 particularity of each country. This equation is expressed as follows.

386

387

388

389

390

391

392

393

394

395

396

397

398

399

400

401

402

403

404

405

406

407

408

409

410

$$\begin{aligned} \text{Scientific Production} = & \beta_0 + \beta_1 (\text{GERD/GDP} = X_1) + \beta_2 (\text{A\&I} = X_2) + \beta_3 (\text{Dummy Argentina}) + \beta_4 (X_1 * \text{Dummy} \\ & \text{Argentina}) + \beta_5 (X_2 * \text{Dummy Argentina}) + \beta_6 (\text{Dummy Canada}) + \beta_7 (X_1 * \text{Dummy Canada}) + \beta_8 (X_2 * (\text{Dummy} \\ & \text{Canada}) + \beta_9 (\text{Dummy France}) + \beta_{10} (X_1 * \text{Dummy France}) + \beta_{11} (X_2 * \text{Dummy France}) + \beta_{12} (\text{Dummy Germany}) \\ & + \beta_{13} (X_1 * \text{Dummy Germany}) + \beta_{14} (X_2 * \text{Dummy Germany}) + \beta_{15} (\text{Dummy Spain}) + \beta_{16} (X_1 * \text{Dummy Spain}) \\ & + \beta_{17} (X_2 * \text{Dummy Spain}) + \beta_{18} (\text{Dummy United Kingdom}) + \beta_{19} (X_1 * \text{Dummy United Kingdom}) + \beta_{20} (X_2 * \\ & \text{Dummy United Kingdom}) + \beta_{21} (\text{Dummy United States}) + \beta_{22} (X_1 * \text{Dummy United States}) + \beta_{23} (X_2 * \text{Dummy} \\ & \text{United States}) + \beta_{24} (\text{Dummy China}) + \beta_{25} (X_1 * \text{Dummy China}) + \beta_{26} (X_2 * \text{Dummy China}) + \beta_{27} (\text{Dummy} \\ & \text{Japan}) + \beta_{28} (X_1 * \text{Dummy Japan}) + \beta_{29} (X_2 * \text{Dummy Japan}) + \beta_{30} (\text{Dummy South Korea}) + \beta_{31} (X_1 * \text{Dummy} \\ & \text{South Korea}) + \beta_{32} (X_2 * \text{Dummy South Korea}) + \beta_{33} (\text{Dummy Russia Federation}) + \beta_{34} (X_1 * \text{Dummy Russian} \\ & \text{Federation}) + \beta_{35} (X_2 * \text{Dummy Russian Federation}) \end{aligned}$$

In this model, Mexico's data are used as a reference (intercept). To check the country effect, the country's value is compared to the reference Mexico values.

Here parameter  $\beta_0$ , the "coordinate at the origin," tells us how much Y increases when all X = 0. Parameter  $\beta_1$ , the "slope," indicates the increase in Y for each increase of 1% to  $X_1$ . The same applies to parameters  $\beta_2$  and  $X_2$ .

Examples:

Equation 1 of Mexico: Scientific Production =  $\beta_0 + \beta_1 X_1 + \beta_2 X_2$ , where all dummy variables equal 0.

Equation 1 of Spain: Scientific Production =  $\beta_0 + \beta_1 X_1 + \beta_2 X_2 + \text{Dummy Spain} + \beta_3 X_1 \text{Dummy Spain} + \beta_4 X_2 \text{Dummy Spain}$ , where dummy Spain = 1 and the other dummies = 0.

In the Spain equation,  $X_1$  and  $X_2$  correspond to GERD/GDP and A&RI, respectively.

We can observe how the panel data model combines in the same equation cross-section data and temporal cut data to demonstrate causality. This model provides more information, more variability, less collinearity among variables and a higher precision. Finally, the data for the very valuable information to individuals following them through time, offers a more complete view of the problem, interpreting the dynamics of the change in cross-

411 sections. One of the most important advantages of panel data with respect to other types of data is that they allow  
 412 us to control unobservable differences.

413 We work a random effects model,  $\varepsilon$  it is assumed to vary stochastically over  $i$  or  $t$  requiring special treatment of  
 414 the error variance matrix.

415  
 416 **3. Results and Discussion**

417  
 418 In this section, we show the parameters estimated by multiple linear regression modeling using panel data. We  
 419 show the general estimates with the predictor variables GERD/GDP and A&RI without the country effect. We  
 420 also show the estimates with the dummy variables to highlight the presence of the different countries.

421 The first estimates correspond to the following general equation.

$$Y = \beta_0 + \beta_1 (\text{GERD/GDP}) + \beta_2 (\text{A\&RI})$$

422  
 423  
 424  
 425 Table 2. Non-standardized estimates of the general model with variables GERD/GDP and A&RI without country  
 426 particularity.

|                        | $\beta$ | Sig.  |
|------------------------|---------|-------|
| $\beta_0 =$ (Constant) | 7.395   | 0.000 |
| $\beta_1 =$ GERD/GDP   | 0.723   | 0.000 |
| $\beta_2 =$ A&RI       | 1.169   | 0.000 |

427  
 428 As we can observe, the GERD/GDP and A&RI variables explain the dependent variable. Here the level of  
 429 significance is 0.000; therefore, the confidence level lies in the 95%–100% range.

430  
 431 Table 3.  $R^2$  adjusted, test F, statistical significance and standard error of the estimate of the general model

|   | R     | R-squared | Adjusted R-squared | Standard Error of the Estimate |
|---|-------|-----------|--------------------|--------------------------------|
| 1 | 0.854 | 0.73      | 0.727              | 0.602                          |

| F       | Sig.  |
|---------|-------|
| 271.382 | 0.000 |

443 Table 3 shows that the adjusted R<sup>2</sup> value is 0.73, which means that the two predictor variables explain the scientific  
 444 production variable with 73% accuracy, which is quite acceptable. The predictive value of the model with its two  
 445 independent variables is high, as shown by the F values and statistical significance.

446  
 447 When the GERD/GDP and A&RI variables tend to 0 in the analyzed countries, on average, the scientific  
 448 production is 1628 (e + 7.395). The effects are seen when the percentage changes. For example, when the  
 449 GERD/GDP variable increases by 1%, the effect on scientific production will be 8.118% provided that the value  
 450 of the A&RI variable remains constant. In contrast, if the number of institutions increases by 1% and GERD/GDP  
 451 is constant, the scientific production increases to 8.564%. In general, we observe that both variables have a positive  
 452 influence on scientific productivity.

453 Table 4 shows the estimates of the model. This allows us to analyze the particularity of each country by applying  
 454 the dummy variables.

455 Table 4. Non-standardized coefficients and significance of the model with GERD/GDP and A&RI variables in  
 456 consideration of country presence

| Country            | Intercept/Dummies |       | GERD/GDP (X <sub>1</sub> ) |       | A&RI (X <sub>2</sub> ) |       |
|--------------------|-------------------|-------|----------------------------|-------|------------------------|-------|
|                    | Coefficient       | Sig.  | Coefficient                | Sig.  | Coefficient            | Sig.  |
| Mexico             | 7.068             | 0.000 | 1.438                      | 0.000 | 1.436                  | 0.000 |
| Argentina          | 7.217             | 0.000 | -1.695                     | 0.000 | -4.017                 | 0.000 |
| Canada             | 18.868            | 0.003 | 0.436                      | 0.510 | -7.395                 | 0.001 |
| China              | -0.020            | 0.989 | 0.128                      | 0.676 | 0.113                  | 0.817 |
| France             | 13.965            | 0.000 | -3.753                     | 0.000 | -3.934                 | 0.000 |
| Germany            | -2.312            | 0.000 | 0.928                      | 0.001 |                        |       |
| Japan              | 3.379             | 0.004 | 0.034                      | 0.900 | -1.588                 | 0.000 |
| Russian Federation | 1.752             | 0.078 | -1.202                     | 0.000 | -0.603                 | 0.065 |
| South Korea        | -4.981            | 0.000 | -0.946                     | 0.000 | 1.184                  | 0.000 |
| Spain              | 0.107             | 0.918 | 0.297                      | 0.180 | -0.286                 | 0.378 |
| United Kingdom     | 15.055            | 0.000 | -2.403                     | 0.326 | -4.519                 | 0.000 |
| United States      |                   |       | 2.782                      | 0.085 | -0.913                 | 0.032 |

457  
 458 Table 5. Adjusted R<sup>2</sup>, test F, statistical significance, and standard error of the estimate of the model in  
 459 consideration of country particularity.

460

| Model | R | R-Squared | Adjusted R-Squared | Standard Error of the Estimate |
|-------|---|-----------|--------------------|--------------------------------|
|-------|---|-----------|--------------------|--------------------------------|



|   |       |       |       |       |
|---|-------|-------|-------|-------|
| 1 | 0.995 | 0.990 | 0.988 | 0.125 |
|---|-------|-------|-------|-------|

461  
462  
463  
464

| F       | Sig.  |
|---------|-------|
| 517.733 | 0.000 |

465 When we incorporate the country variable, prediction improves compared with the prediction of the previous  
466 general model. Here the adjusted R<sup>2</sup> takes a value of 0.988, which means that these two variables explain the  
467 dependent variable for all countries by 98%. Therefore, panel data with dummy variables improve the estimate by  
468 reducing the error from 0.602 to 0.125. The standard error of the estimate represented by the letter "S" is used to  
469 make inferences about the fit of the data to the regression equation, it is also the point estimate of the standard  
470 deviation of the error and Y. Models will be preferred where S is closest to zero.

471 As shown in Table 4, the model excludes the dummy variable for the United States because the dummy data of  
472 this country had the highest collinearity (close to 1) in data for the A&RI variable as the number of institutions  
473 that are responsible for 50% of the United States' scientific production remains constant over the years. Another  
474 excluded variable is Germany\_A&RI because it has high correlation with Germany's GERD/GDP. However, even  
475 when the regression model excludes these variables, their effect will be measured and added to the effect of the  
476 rest of the countries in a global manner according to their statistical significance.

477  
478  
479  
480  
481  
482  
483

484 Table 6. Excluded variables

485  
486  
487  
488  
489  
490  
491  
492

| Model                 | $\beta$ | Sig.  |
|-----------------------|---------|-------|
| Dummy United States   | 7.720   | 0.003 |
| Dummy Germany<br>A&RI | 1.071   | 0.376 |

493 The following figures show the different effects of the different countries based on the estimates shown in Table  
494 4.

495 As can be seen in Table 6, the United States dummy variable is significant with respect to scientific production.  
 496 However, the dummy variable for Germany's A&RI is not significant and will therefore have the effect of the  
 497 reference country, i.e., Mexico.

498  
 499 Fig. 1 Effect on scientific production of different countries when variables GERD/GDP and A&RI tend to 0

500 Insert figure1 here.

501  
 502 When the economic investment and the presence of institutions tend to zero, the scientific production of Mexico  
 503 is 7.068%. The dummy variables of countries that are not significant and therefore demonstrate behavior equal to  
 504 that of Mexico include Japan, Russia, Spain, and China. The effect of these countries is the same as that of Mexico,  
 505 i.e., when the GERD/GDP and A&RI variables tend to zero, the scientific production of these countries is 7.068%.  
 506 When these variables tend to zero, the countries that surpass Mexico in percentage of scientific production are  
 507 Argentina with production of 14.285%, France with 21.033%, and the United Kingdom with 22.123%. The  
 508 maximum value comes from Canada with 25.936%.

509 As mentioned in the introduction, scientific production could be increased through collaboration. In the following  
 510 table, we will check if these countries mentioned above have high levels of scientific collaboration.

511  
 512 Table 7. Percentage of scientific collaboration documents classified by international, national, and institutional  
 513 collaborations from different countries (1999–2016)

|                       | % International<br>Collaboration | % National<br>Collaboration | % Institutional<br>Collaboration |
|-----------------------|----------------------------------|-----------------------------|----------------------------------|
| Mexico                | 37.9                             | 16.8                        | 36                               |
| Argentina             | 39.5                             | 18.5                        | 31.8                             |
| Canada                | 40.4                             | 11.3                        | 34                               |
| France                | 42.5                             | 23.1                        | 21.3                             |
| Germany               | 40.4                             | 11.5                        | 34.8                             |
| Japan                 | 20.6                             | 22.6                        | 47.9                             |
| Russian<br>Federation | 28.1                             | 14.6                        | 40.2                             |
| South Korea           | 25.1                             | 25.2                        | 44.1                             |
| Spain                 | 36.7                             | 16.2                        | 38.3                             |
| United<br>Kingdom     | 38.2                             | 13.1                        | 26.9                             |
| China                 | 15.9                             | 24.9                        | 54.7                             |
| United States         | 24.7                             | 19.8                        | 36                               |

514  
515 Mexico has an international collaboration rate of 37.9%, and Argentina, France, the United Kingdom, and Canada  
516 have international collaboration rates of 39.5%, 42.5%, 38.2%, and 40.4%, respectively.  
517 However, countries that behave like Mexico have a smaller percentage of documents in international collaboration  
518 and more in institutional collaboration. These countries are Japan, the Russian Federation, Spain, and China. Note  
519 that Mexico's international collaboration (37.9%) and institutional collaborations (36%) are nearly the same.  
520 The only country with a lower value than the intercept is Germany, which has an effect of 4.756%, although it has  
521 a high percentage of international collaboration (40%). South Korea has a 2.087% lower value than Mexico and  
522 has lower international collaboration (25%) and more institutional collaboration (44%). International collaboration  
523 explains the highest values in production with respect to Mexico because these countries have a greater percentage  
524 of collaboration than Mexico.  
525 Figure 2 shows the effect of the different countries on the scientific production relative to a 1% increase in  
526 GERD/GDP.

527  
528  
529 Fig.2 Effect on scientific production when GERD/GDP increases by 1% in all countries

530 Insert figure2 here.

531  
532 If we increase the GERD/GDP of all countries by 1%, the scientific production increases in all of them, except for  
533 Argentina and France, whose scientific production diminishes and shows a negative effect. The fact is that  
534 Argentina had a fluctuating and low investment in GERD/GDP throughout 1996–2008. Despite the government's  
535 low investment in science, scientific production continued to increase. In 2009, there was a boom in research  
536 investment, which was the maximum in the country's history to date. Thus, from that time point to the present,  
537 investment has been increasing and has remained on the rise and stabilized since then. We show this fact more  
538 clearly in Figure 3. The data from 2009–2012 (GERD/GDP) with 2012/2015 (Scientific production) make the  
539 relationship significant in Argentina; however, as most data 1996- 2008 GERD/GDP have a negative relationship  
540 with respect to data from scientific production 1999-2011, the regression interprets it as negative because this is  
541 the majority. If this same study would be performed 10 years later and investment in Argentina continues to rise  
542 (as well as production), the sign would change and the relationship would be positive.

543  
544  
545  
546

547  
548  
549  
550  
551  
552  
553  
554  
555  
556  
557  
558  
559  
560  
561  
562  
563  
564  
565  
566  
567  
568  
569  
570  
571  
572  
573  
574  
575  
576  
577  
578  
579

Fig. 3 GERD/GDP versus scientific production of Argentina

Insert figure 3 here.

In France, the trend is similar to that in Argentina. Investment in science during the years 1996–2008 was low, whereas production continued to rise in this period. In 2009, France shows the highest rise in research in 10 years. Figure 4 shows the relationship of GERD/GDP to scientific production. The most recent data show high values that make the slope positive. However, the estimation considers all values, which yields a negative relation. France is the fourth OECD (Organization for Economic Co-operation and Development) country behind the United States, Germany, and Japan relative to science investment. France also ranks sixth in the world in terms of the numbers of scientists.

Fig. 4 GERD/GDP versus scientific production of France

Insert figure 4 here.

If the GERD/GDP increases by 1%, the scientific production in the case of Mexico will increase by 1.44%. Countries that have the same effect as Mexico are Canada, China, Japan, Spain, and the United Kingdom. Countries that have a greater effect than Mexico are the United States and Germany. In contrast, countries that have a smaller effect than the reference country are Russia and South Korea. Although Figures 3 and 4 show three values in the window 2009–2012, two of those values overlap and only one is shown.

Fig. 5 Effect on scientific production of different countries when A&RI increases by 1%

Insert figure 5 here

This figure reflects the fact that there are countries that tend to decentralize scientific production and others prefer to concentrate it among a lower number of institutions. Accordingly, if the number of institutions with at least 50% of Mexico's scientific output increases by 1%, their production increases by 1.436%. Countries that behave like Mexico are Germany, Russia, Spain, and China.

In contrast, the United States shows an effect that is 0.523 less than Mexico. Note that the United States maintains the number of institutions as constant over the years; thus, the variable was excluded from regression. The countries

580 that appear to concentrate their production among a smaller number of institutions over the years are Japan, France,  
581 Argentina, the United Kingdom, and Canada. In fact, scientific production decreases in these countries if the A&RI  
582 value increases by 1%. Here Japan decreases its scientific production by 0.152, France by 2.498, Argentina by  
583 2.581, the United Kingdom by 3.083, and Canada by 5.959. It appears that the production of these countries is  
584 positioning them to have fewer and fewer institutions over time. These are the countries whose production would  
585 be higher if both the GERD/GDP and A&RI are reduced.

586 The countries with negative effects in A&RI are those that have effectively concentrated production into fewer  
587 institutions. In contrast, those with positive effects tend to diversify productivity across more institutions.

588 A forthcoming study will analyze the citations received by countries that concentrate scientific production among  
589 fewer institutions and those that decentralize production to more institutions. With this analysis, we expect to  
590 determine which of the two measures is more efficient.

591 Finally, we would like to compare our study with others previously done. Castellacci and Natera [52] also studied  
592 the evolution of innovation national systems using panel data. Unlike that, our study uses a shorter time window  
593 (17 years instead of 27), which reduces the probability of observing structural changes on national research policies  
594 that would affect its results. On the other hand, we permit heterogeneity in the intercept and coefficients of every  
595 country, whereas Castellacci and Natera [52] can only assess heterogeneity for a few groups of countries, either  
596 by Gross Domestic Product (GDP) or by continent.

#### 597 598 **4. Conclusions**

599 We have presented a causal model of the scientific production of countries through multiple linear regression using  
600 panel data. Panel data simultaneously exploit temporal (17 years) and cross-sectional dimensions (countries); thus,  
601 including more observations the error is minimized. Therefore, the results are attributed to causality rather than  
602 correlation.

603 Although our initial hypothesis included five variables: GERD/GDP, Researchers (FTE), A&RI, subject areas,  
604 and total citations received influencing scientific productivity, only two variables complied with all statistical  
605 assumptions. These are: GERD/GDP and Academic and Research Institutions (A&RI) which are responsible for  
606 the 50% of the production.

607 We verified that the number of researchers, subject areas that comprise 50% of scientific production, and total  
608 citations would not satisfy the statistical assumptions. Therefore, we could not verify whether they have a causal  
609 effect on scientific production using multiple regression.

610 When multiple linear regression is performed without the country effect, an  $R^2$  value (coefficient of determination)  
611 of 0.73 is obtained, which means that these two variables explain the dependent variable by 73%. When the country  
612 effect is considered using panel data, the  $R^2$  value increases to 0.98 at a significance level of 0.05. With our panel  
613 data model we reduce the error from 0.602 to 0.125.

614 We could observe the difference in the behaviour of the countries with respect to Mexico, the reference country,  
615 through parameter estimation. With Mexico, the two independent variables are significant, which is not the case  
616 for all countries, such as China and Spain, whose coefficients were not significant, thereby indicating that they  
617 behave the same as the reference country (Mexico).

618 We obtained a predictive statistical model to explain scientific production. This model considers scenarios in which  
619 we assume increases to either of the two independent variables to determine its effect on scientific production (the  
620 dependent variable) and compare different effects.

621 The United States and Germany most effectively capitalize investment in research. For Argentina and France, it  
622 was not possible to demonstrate a positive effect of investment in production because we need to observe the  
623 phenomenon over a longer period.

624 Five of the countries analyzed tend to concentrate scientific production among only a few institutions. If the  
625 number of institutions that comprise 50% of the scientific production increases, then productivity will decrease in  
626 Japan, France, Argentina, the United Kingdom, and Canada. Note that the United States maintains a constant  
627 number of institutions over time.

628 The regression model will allow researchers to prognosticate future scientific production. This can be achieved in  
629 a way that, when we increase the GERD/GDP values, we can observe effects on scientific production. Similarly,  
630 we can also make forecasts relative to the A&RI variable. We believe that our causal multiple regression model  
631 can support the governments of each country be aware of the importance of increasing their investment on science  
632 and concentrating or diversifying research budget on institutions.

633 Finally, this paper will be relevant for public administrations, governments, private sectors, councils responsible  
634 for Science and Technology policies because they could make inferences about how through some increase in  
635 investment scientific production could be boosted in a period of time. This type of study can provide some insights  
636 for comparing the science and technology policies of a country with respect to those of a group of countries, in  
637 order to find what they do differently to improve their scientific productivity.

638 Furthermore, this is a general spectrum of 12 strategic partners. The same study could be done taking into account  
639 different countries. We encourage countries to create more scientific alliances, getting involved, committing their

640 effort and experience to achieve a certain purpose in which they could benefit in a framework of common  
641 cooperation.

642

### 643 **Acknowledgments**

644 We are grateful to Tecnológico de Monterrey, which supported this study through the Intelligent Systems Group.

645 We also acknowledge the very valuable statistical guidance and assistance from Jose Enrique Montemayor

646 Gallegos, Director of Academic Evaluation and Institutional Effectiveness at Tecnológico de Monterrey. His

647 knowledge and expertise were fundamental in constructing the multiple regression model using panel data.

### 648 **5. References**

649 1. Rivera R, Sampedro JL, Dutrenit G. How productive are academic researchers in agriculture related sciences?

650 The Mexican case. Working paper series. Resource document. United Nations University - Maastricht Economic

651 and social Research and training center on Innovation and Technology. 2009. Retrieved August 10, 2017, from

652 <http://www.merit.unu.edu/publications/working-papers/abstract/?id=3787>.

653 2. Zhang Q, Perra N, Gonçalves B, Ciulla F, Vespignani A. Characterizing scientific production and consumption

654 in physics. *Scientific Reports*. 2013; 3

655 3. Gantman ER. Economic, linguistic and political factors in the scientific productivity of countries.

656 *Scientometrics*. 2012; 93 (3): 967–985

657 4. Bozeman B, Corley E. Scientists' collaboration strategies: Implications for scientific and technical human

658 capital. *Research Policy*. 2004; 33 (4): 599–616.

659 5. Heinze T, Shapira P, Rogers JD, Senker JM. Organizational and Institutional Influences on creativity in

660 scientific research. *Research Policy*. 2009; 38(4): 610–623.

661 6. Rueda-Barrios G, Rodenes-Adam M. Factores determinantes en la producción científica de los grupos de

662 investigación en Colombia. *Revista Española de Documentación Científica*. 2016; 39(1): e118.

663 7. Barjak F. Research productivity in the internet era. *Scientometrics*. 2006; 68 (3): 343–360.

664 8. Katz J, Hicks D. How much is a collaboration worth? A calibrated bibliometric model. *Scientometrics*. 1997;

665 40(3): 541–554.

666 9. Aksnes D. Characteristics of highly cited papers. *Research Evaluation*. 2003; 12 (3): 159–170.

667 10. Leimu R, Koricheva J. Does scientific collaboration increase the impact of ecological articles? *Bio Science*.

668 2005; 55 (5): 438–443.



- 669 11. Moya-Anegon F, Chinchilla- Rodriguez Z, Corera-Alvarez E, Gonzalez-Molina A, Hassan-Montero Y,  
670 Vargas-Quesada B (2008). Indicadores bibliométricos de la actividad científica española: 2002–2006. Madrid:  
671 Fecyt.
- 672 12. Chinchilla-Rodriguez Z, Vargas- Quesada B, Hassan-Montero Y, Gonzalez-Molina A, Moya-Anegon F. New  
673 approach to the visualization of international scientific collaboration. *Information Visualization*. 2010; 9(4): 277–  
674 287.
- 675 13. Hsu JW, Huang DW. Correlation between impact and collaboration. *Scientometrics*. 2010; 86(2): 317–324.
- 676 14. Lancho-Barrantes BS, Guerrero-Bote VP, Moya-Anegon F. Citation flows in the zones of influence of  
677 scientific collaborations. *Journal of the American Society for Information Science and Technology*. 2012; 63(3):  
678 481–489.
- 679 15. Lancho-Barrantes BS, Guerrero-Bote VP, Moya-Anegon F. Citation increments between collaborating  
680 countries. *Scientometrics*. 2013; 94(3): 817–831.
- 681 16. Nguyen TV, Pham LT. Scientific output and its relationship to knowledge economy: An analysis of ASEAN  
682 countries. *Scientometrics*. 2011; 89(1): 107–117.
- 683 17. Inglesi-Lotz R, Chang T, Gupta R. Causality between research output and economic growth in BRICS. *Quality*  
684 *and Quantity*. 2015; 49(1): 167–176.
- 685 18. Kumar R, Stauvermann PJ, Patel A. Exploring the link between research and economic growth: an empirical  
686 study of China and USA. *Quality & Quantity: International Journal of Methodology*. 2016; 50(3): 1073–1091.
- 687 19. Solarin SA, Yen YY. A global analysis of the impact of research output on economic growth. *Scientometrics*.  
688 2016; 108(2): 855–874.
- 689 20. Moya-Anegon F, Herrero-Solana V. Science in America Latina: A comparison of bibliometric and scientific-  
690 technical indicators. *Scientometrics*. 1999; 46(2): 299–320.
- 691 21. Ebadi A, Schiffauerova A. Impact of funding on scientific output and collaboration: A survey of literature.  
692 *Journal of Information and Knowledge Management*. 2013; 12(4): 1–16.
- 693 22. Ebadi A, Schiffauerova A. How to boost scientific production? A statistical analysis of research funding and  
694 other influencing factors. *Scientometrics*. 2016; 106(3): 1093–1116.
- 695 23. Aksnes DW, Sivertsen G, van Leeuwen TN, Wendt KK. Measuring the productivity of national R&D systems:  
696 Challenges in cross-national comparisons of R&D input and publication output indicators. *Science and Public*  
697 *Policy*. 2017; 44: 246-258.

- 698 24. Meo SA, Al Masri AA, Usmani AM, Halepoto DM Impact of GDP, spending on R&D, the number of  
699 universities and scientific journals on research publications in environmental sciences in the Middle East.  
700 *International Journal of Occupational Medicine and Environmental Health*. 2013; 26(5): 702–709.
- 701 25. Meo SA, Al Masri, AA, Usmani AM, Memon AN, Zaidi SZ. Impact of GDP, spending on R&D, number of  
702 universities and scientific journals on research publications among Asian countries. 2013; *PLoS ONE*, 8(6):  
703 e66449.
- 704 26. Meo SA, Usmani AM. Impact of R&D expenditures on research publications, patents and high-tech exports  
705 among european countries. *European Review for Medical and Pharmacological Sciences*. 2014; 8(1): 1–9.
- 706 27. Meo SA, Usmani AM, Vohra MS, Bukhari IA. Impact of GDP, spending on R&D, number of universities and  
707 scientific journals on research publications in pharmacological sciences in Middle East. *European Review for*  
708 *Medical and Pharmacological Sciences*. 2013; 17(20): 2697–2705.
- 709 28. Lee LC, Lin PH, Chuang YW, Lee YY. Research output and economic productivity: A Granger causality test.  
710 *Scientometrics*. 2011; 89(2): 465–478.
- 711 29. Ntuli H, Inglesi-Lotz R, Chang TY, Pouris A. Does research output cause economic growth or vice versa?  
712 Evidence from 34 OECD countries. *Journal of the Association for Information Science and Technology*. 2015;  
713 66(8): 1709–1716.
- 714 30. Duclos A, Herquelot E, Polazzi S, Malbezin M, Claris O. Performance curves of medical researchers during  
715 their career: Analysis of scientific production from a retrospective cohort. 2017; *BMJ Open*, 7(2).
- 716 31. Bornmann L, Stefaner M, Moya Anegon F, Mutz R. What is the effect of country-specific characteristics on  
717 the research performance of scientific institutions? using multi-level statistical models to rank and map universities  
718 and research-focused institutions worldwide. *Journal of Informetrics*. 2014; 8(3): 581-593.
- 719 32. King DK. The scientific impact of nations. *Nature*. 2004; 430: 311–316.
- 720 33. Daraio C, Fabbri F, Gavazzi G, Izzo MG, Leuzzi L, Quaglia, G, Ruocco G. Assessing the interdependencies  
721 between scientific disciplinary profiles at the country level: A pseudo-likelihood approach. Paper presented at  
722 the ISSI 2017 - 16th International Conference on Scientometrics and Informetrics, Conference Proceedings.  
723 2017; 1448-1459.
- 724 34. Li N. Evolutionary patterns of national disciplinary profiles in research: 1996–2015. *Scientometrics*.  
725 2017; 111(1): 493-520.
- 726 35. Hayati Z, Ebrahimi S. Correlation between quality and quantity in scientific production: A case study of  
727 iranian organizations from 1997 to 2006. *Scientometrics*. 2009; 80(3): 625-636.

- 728 36. Huang D. Positive correlation between quality and quantity in academic journals. *Journal of Informetrics*.  
729 2016; 10(2): 329-335.
- 730 37. Mayorga MM, Muñoz SE. La tecnica de datos de panel una guía para su uso e interpretación. Banco Central  
731 de Costa Rica. Departamento de investigaciones economicas. 2000; Retrieved August 10, 2017 from  
732 [http://www.bccr.fi.cr/investigacioneseconomicas/metodoscuantitativos/Tecnica\\_datos\\_panel\\_una\\_guia\\_para\\_su](http://www.bccr.fi.cr/investigacioneseconomicas/metodoscuantitativos/Tecnica_datos_panel_una_guia_para_su_uso_e_interpretacion.pdf)  
733 [uso\\_e\\_interpretacion.pdf](http://www.bccr.fi.cr/investigacioneseconomicas/metodoscuantitativos/Tecnica_datos_panel_una_guia_para_su_uso_e_interpretacion.pdf).
- 734 38. Conacyt. National general report of science, technology and innovation. 2016; Retrieved August 10, 2017 from  
735 <http://www.siicyt.gob.mx/index.php/transparencia/informes-conacyt/informe-general-del-estado-de-la-ciencia->  
736 [tecnologia-e-innovacion/informe-general-2016](http://www.siicyt.gob.mx/index.php/transparencia/informes-conacyt/informe-general-del-estado-de-la-ciencia-)
- 737 39. Lancho- Barrantes, Cantu-Ortiz (2019). Science in Mexico: a bibliometric analysis. *Scientometrics*, 118 (2):  
738 499-517.
- 739 40. Arvantis R, Russel JM, Rosas A.M.A. Experiences with the national citation reports database for measuring  
740 national performance: The case of Mexico. *Scientometrics*. 1996; 35: 247–255.
- 741 41. Lima M, Liberman S, Russell JM. Scientific group cohesiveness at the National University of Mexico.  
742 *Scientometrics*. 2005; 64(1): 55–66.
- 743 42. Castillo-Perez JJ, Muñoz-Valera L, Garcia-Gomez F, Mejia-Arangure JM. Analisis bibliometrico de la  
744 produccion cientifica sobre la influenza en Mexico, 2000–2012. *Revista Medica del Instituto Mexicano del Seguro*  
745 *Social*. 2015; 53(3): 294–301.
- 746 43. Uddin A, Singh VK, Pinto D, Olmos I. Scientometric mapping of computer science research in Mexico.  
747 *Scientometrics*. 2015; 105(1): 97–114.
- 748 44. Franco-Paredes K, Diaz-Resendiz FJ, Pineda-Lozano JE, Hidalgo-Rasmussen CA. Bibliometric analysis of  
749 scientific production of Mexican Journal of Eating Disorders, 2010–2014. *Revista Mexicana de Trastornos*  
750 *Alimentarios*. 2016; 7(1): 9–16.
- 751 45. Frixione E, Ruiz Zamarripa L, Hernandez G. Assessing individual intellectual output in scientific research:  
752 Mexico’s national system for evaluating scholars performance in the humanities and the behavioral sciences.  
753 *PLoS ONE*. 2016; 11(5): e0155732.
- 754 46. Hernandez-Garcia YI, Chamizo JA, Kleiche-Dray M, Russell, J. The scientific impact of mexican steroid  
755 research 1935–1965: a bibliometric and historiographic analysis. *Journal of the Association for Information*  
756 *Science & Technology*. 2016; 67(5); 1245–1256.

- 757 47. Villaseñor A, Arencibia R, Carrillo-Calvet H. Multiparametric characterization of scientometric performance  
758 profiles assisted by neural networks: a study of Mexican higher education institutions. *Scientometrics*. 2017;  
759 110(1): 77–104.
- 760 48. Scopus. Elsevier. 2017; Retrieved August 10, 2017, from <https://www.elsevier.com/solutions/scopus>.
- 761 49. Moya, F., Chinchilla, Z., Vargas, B., Corera, E., Muñoz, F., González, A., & Herrero, V. (2007). Coverage  
762 analysis of Scopus: A journal metric approach. *Scientometrics*, 73(1), 53–78.
- 763 50. UIS Statistics. UNESCO Institute for Statistics. 2017; Retrieved August 10, 2017, from  
764 <http://data.uis.unesco.org/>.
- 765 51. Chamberlain G. Multivariate regression models for panel data. *Journal of Econometrics*. 1982; 18(1): 5–46.
- 766 52. Castellacci F, Natera JM. The Dynamics of National Innovation Systems: A Panel Cointegration Analysis of  
767 the Coevolution between Innovative Capability and Absorptive Capacity. *Research Policy*. 2013; 42(3): 579-594.

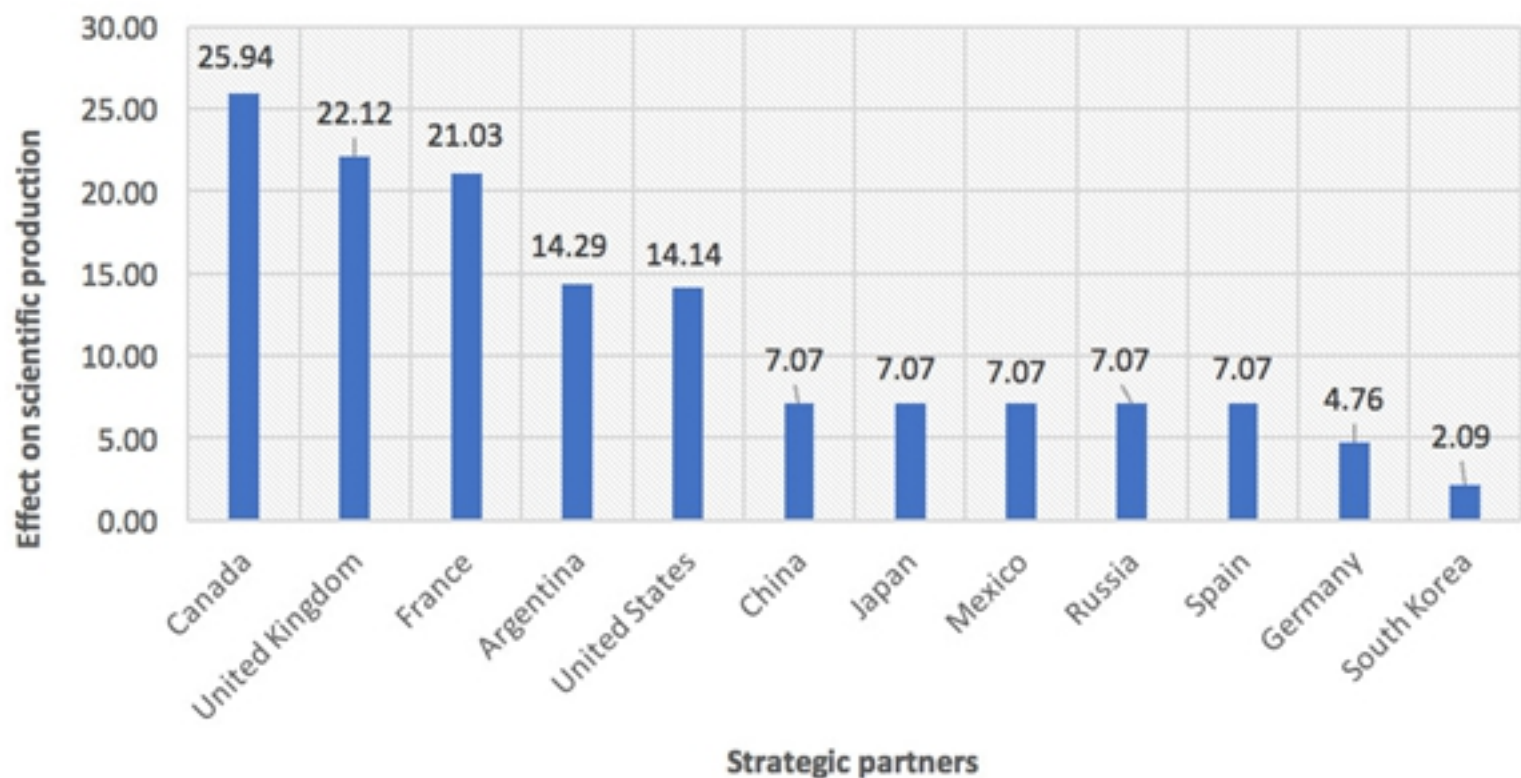

Figure 1

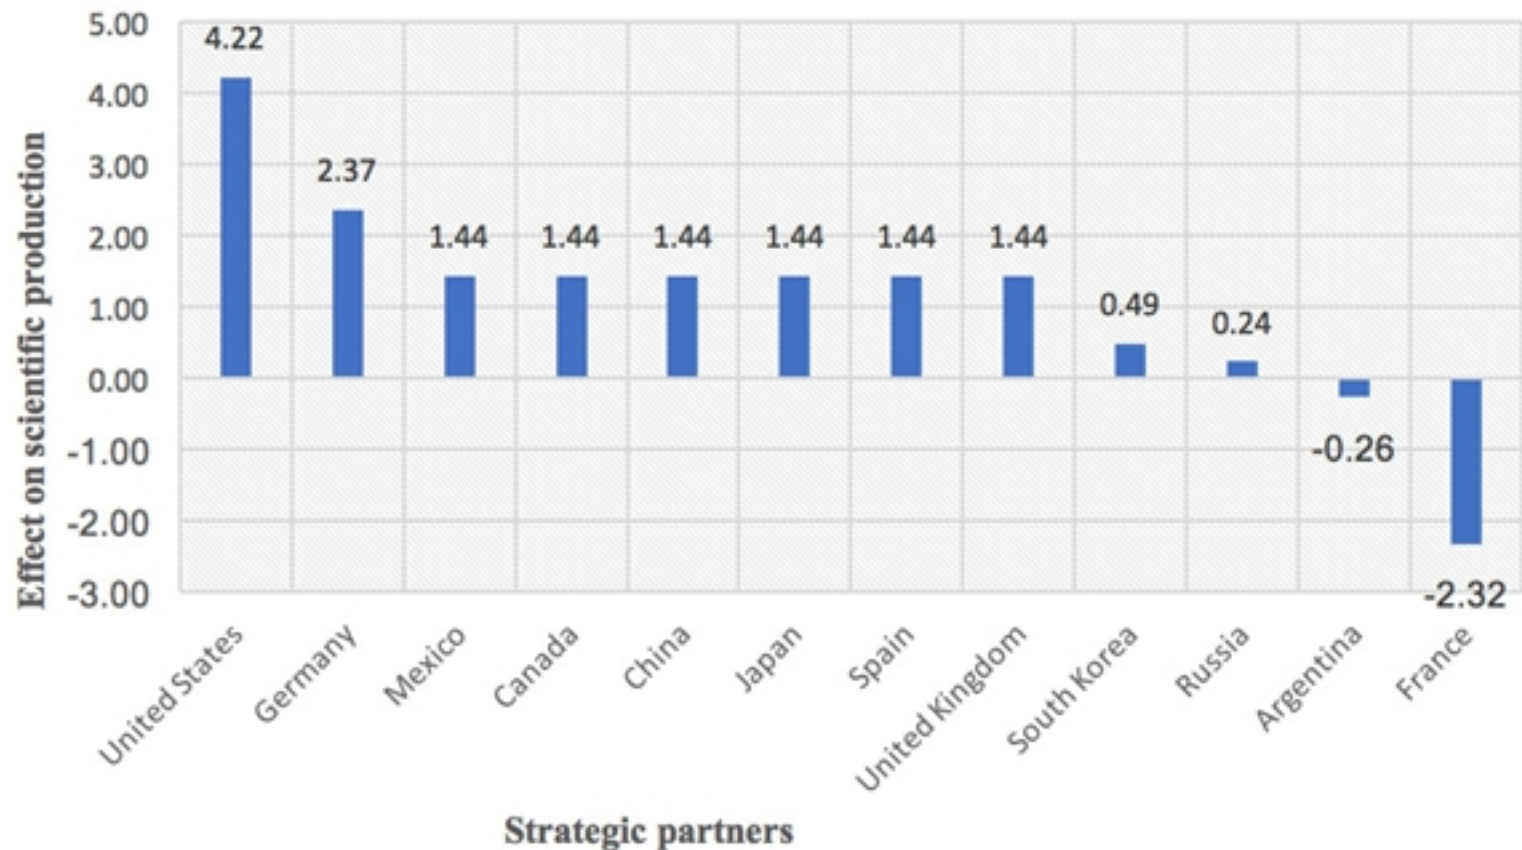

Figure2



SCIENTIFIC PRODUCTION

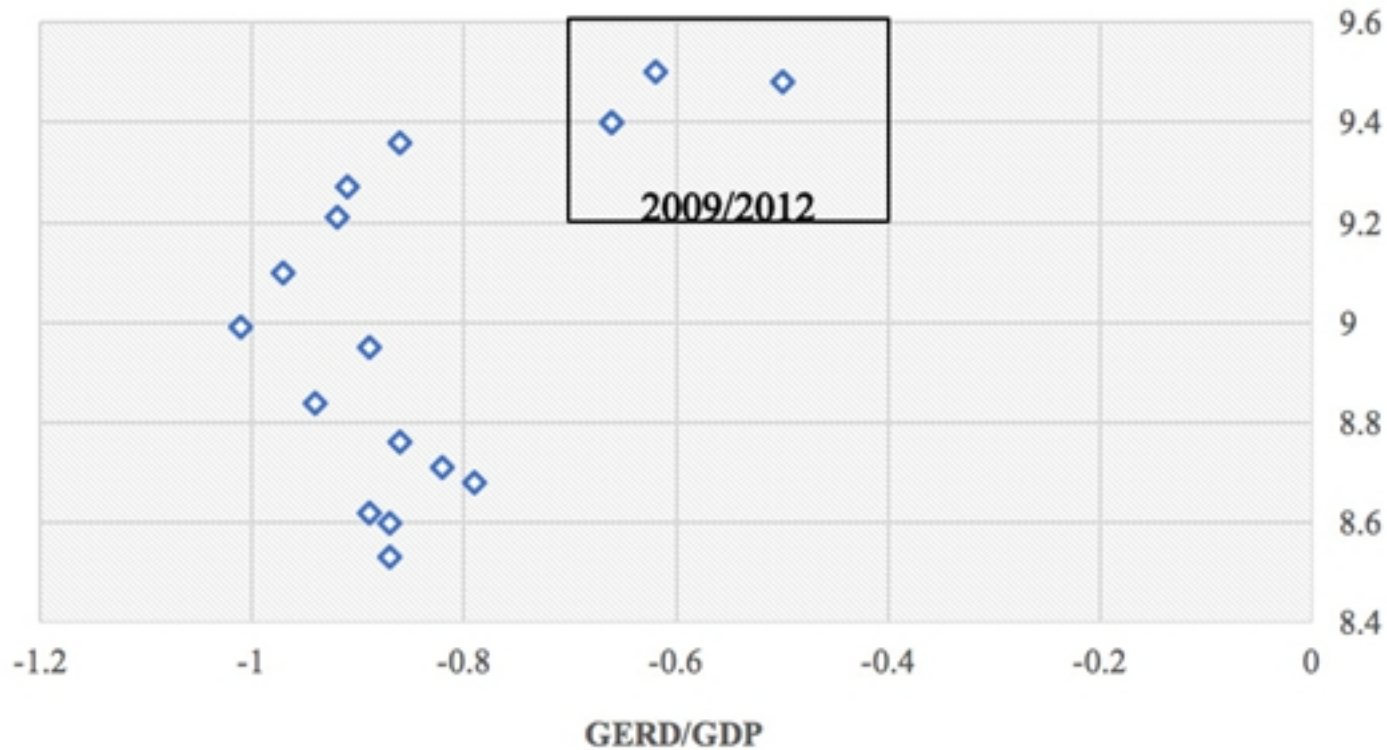

Figure3



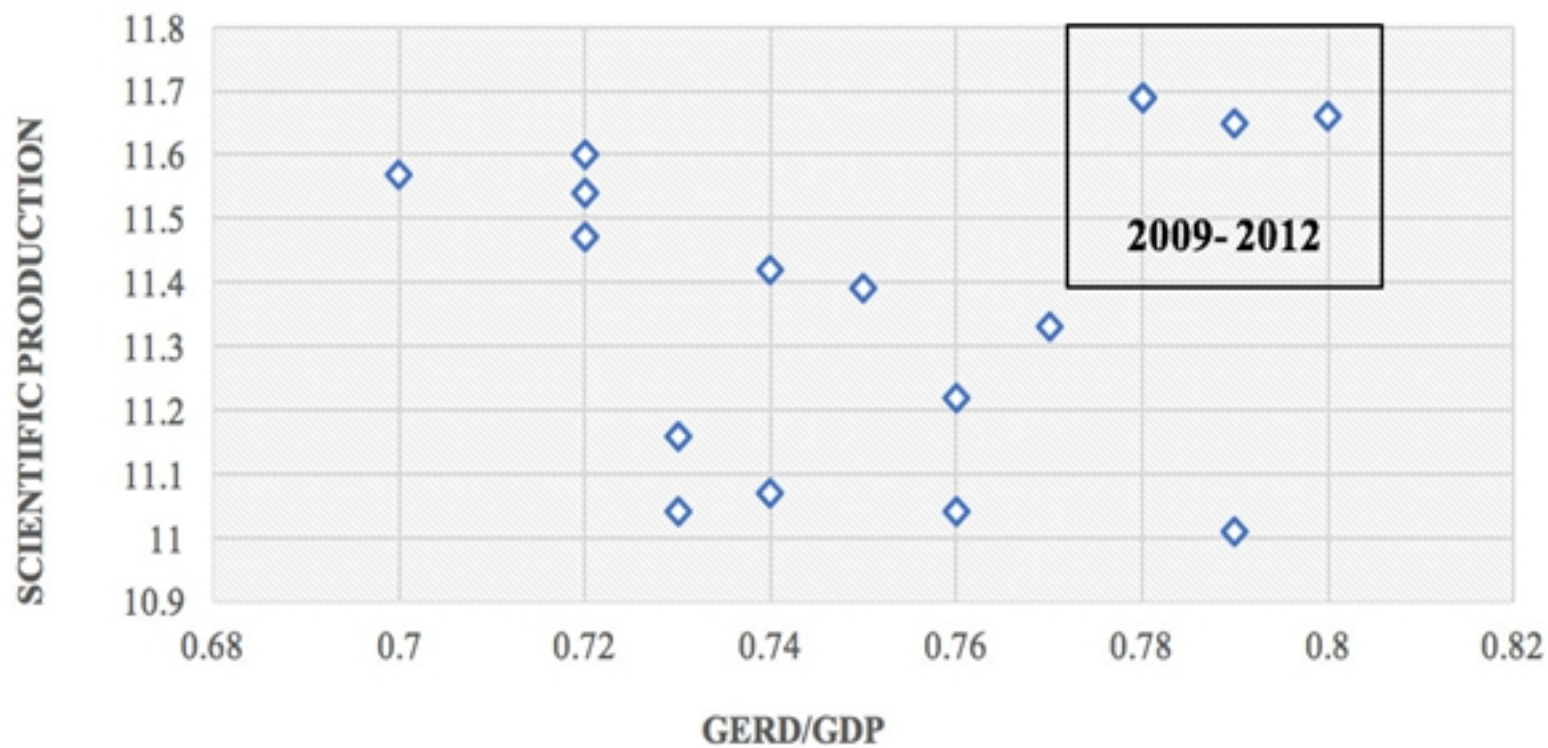

Figure4

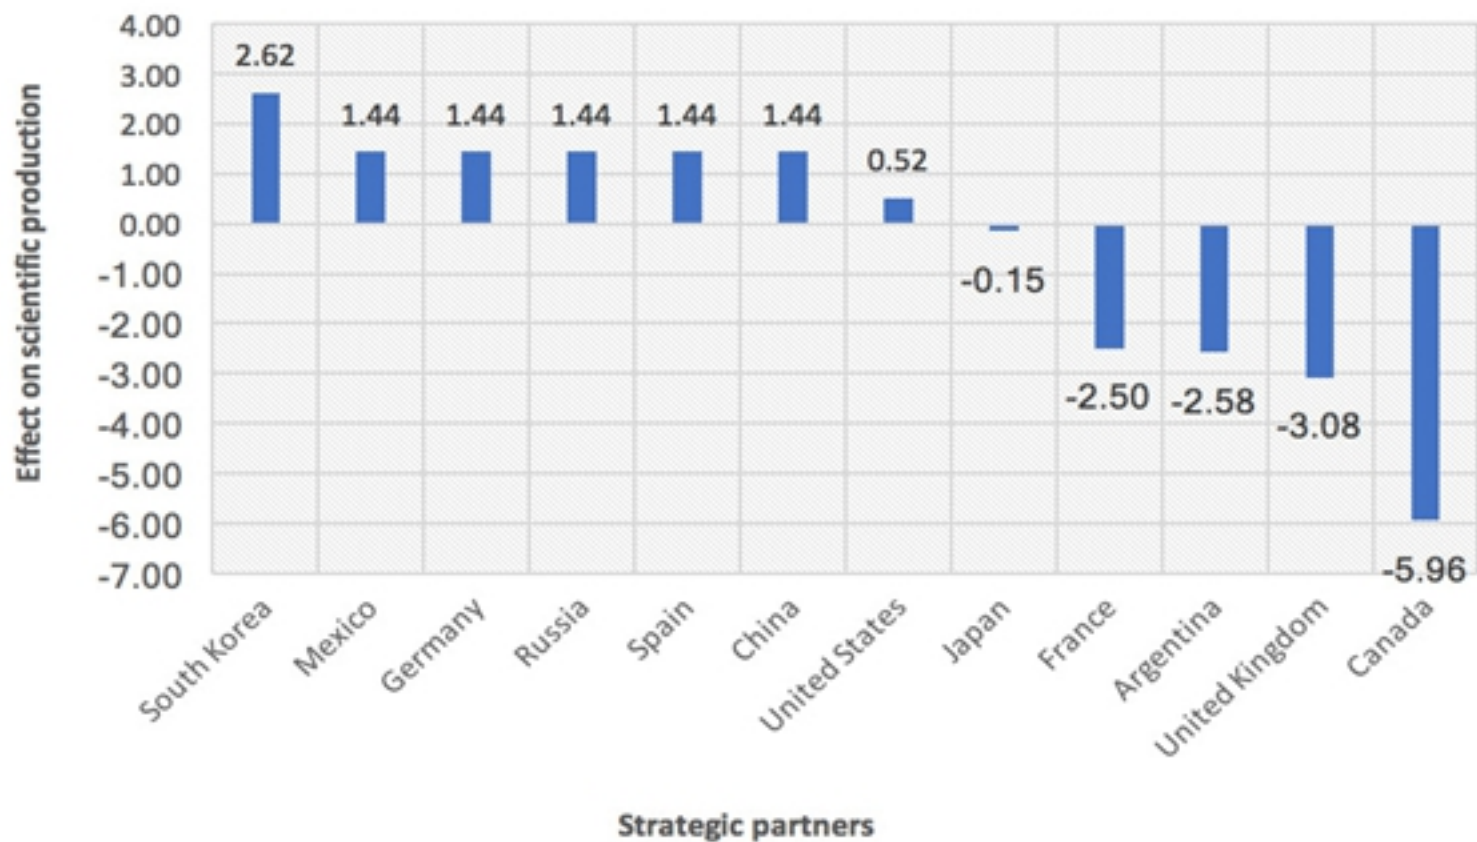

Figure3
